# Supplementary material for: Proteasome subunit α1 overexpression preferentially drives canonical proteasome biogenesis and enhances stress tolerance in yeast
Source: PubMed Central journal article supplement (PMC6712033; doi:10.1038/s41598-019-48889-5), 2019-08-27
Supplement: 41598_2019_48889_MOESM1_ESM.pdf [file 41598_2019_48889_MOESM1_ESM.pdf]

## **Supplementary Information**

### **Proteasome subunit $\alpha 1$ overexpression preferentially drives canonical proteasome biogenesis and enhances stress tolerance in yeast**

Lauren A. Howell, Anna K. Peterson, and Robert J. Tomko Jr.\*

Department of Biomedical Sciences, Florida State University College of Medicine, Tallahassee, Florida 32306, USA

\*Correspondence and requests for materials should be addressed to R. J. T., Jr. (email: robert.tomko@med.fsu.edu)

Howell *et al*, Supplementary Figure S1  
 Data related to Figure 1 in main text

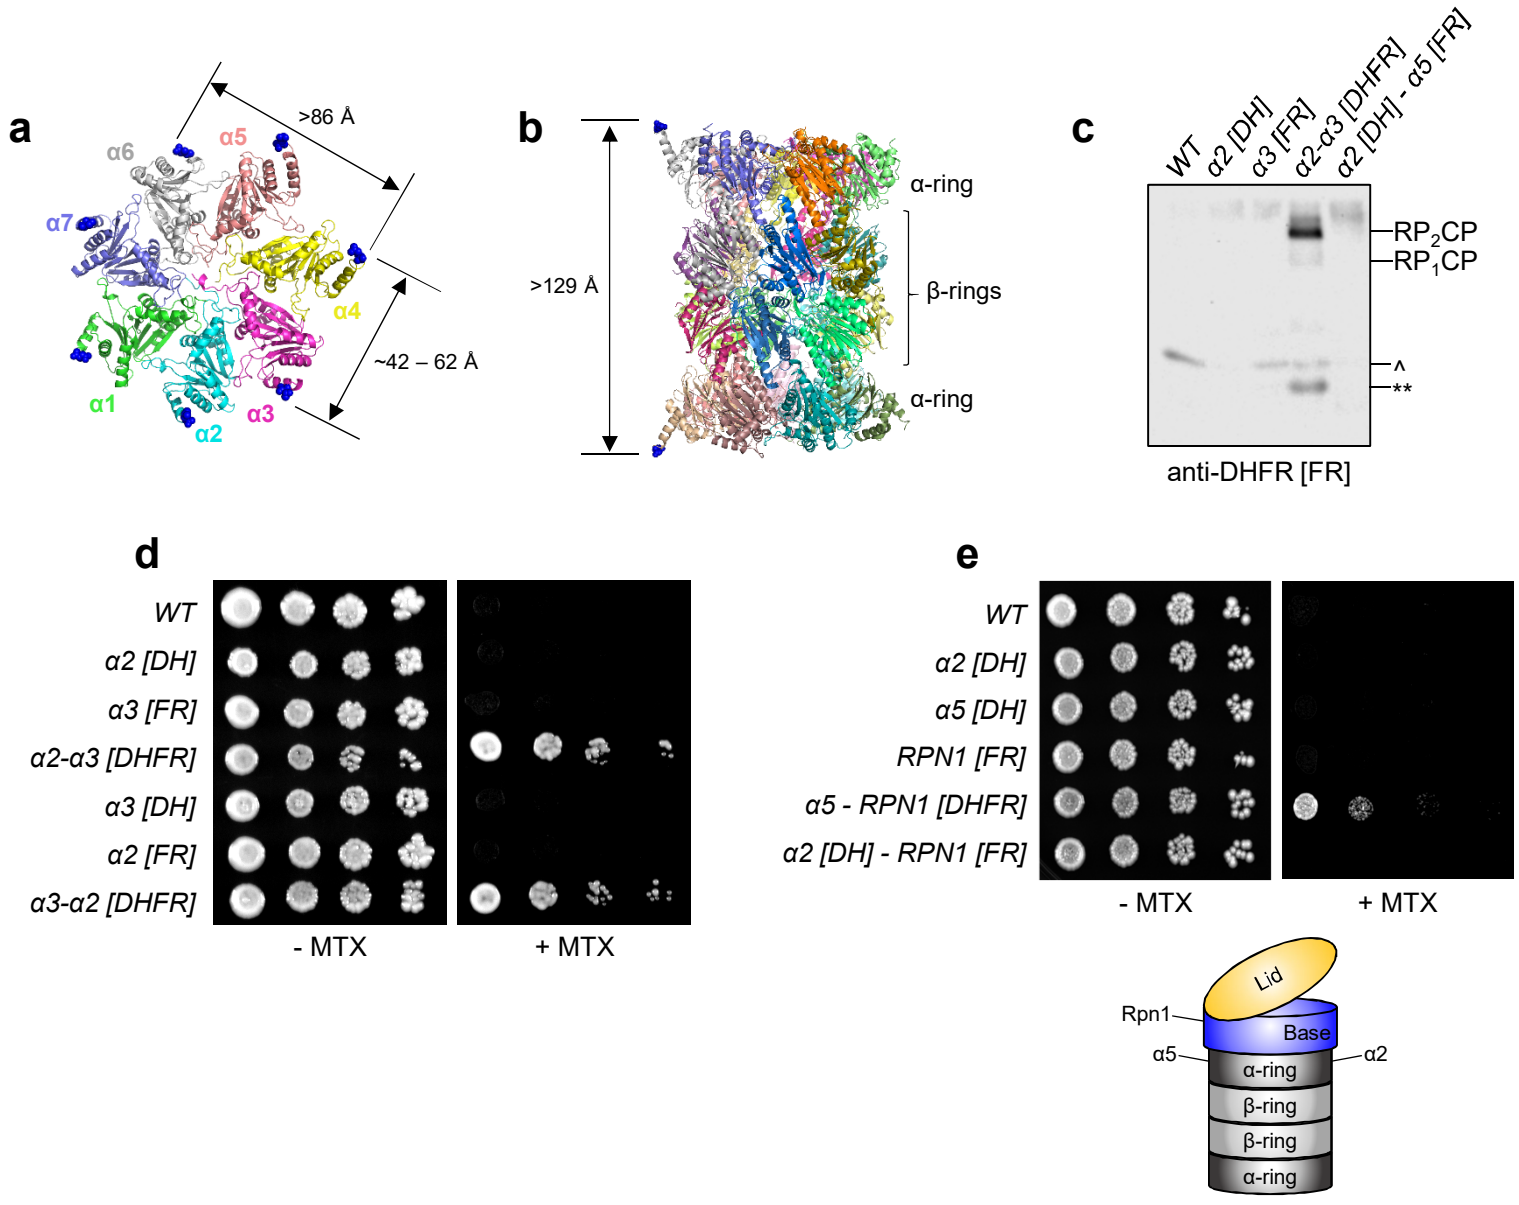



Howell *et al*, Supplementary Figure S3  
Data related to Figure 3 in main text

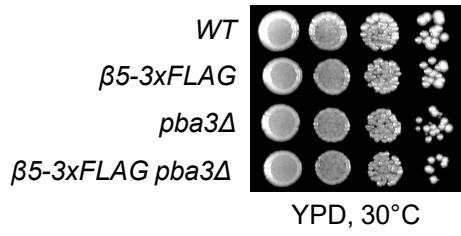

Howell *et al*, Supplementary Figure S4  
Data related to Figure 5 in main text

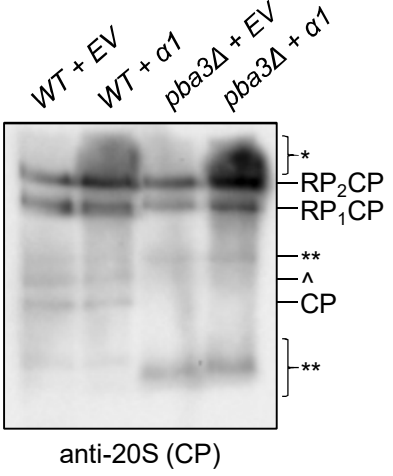

Howell *et al*, Supplementary Figure S5  
Data related to Figure 6 in main text

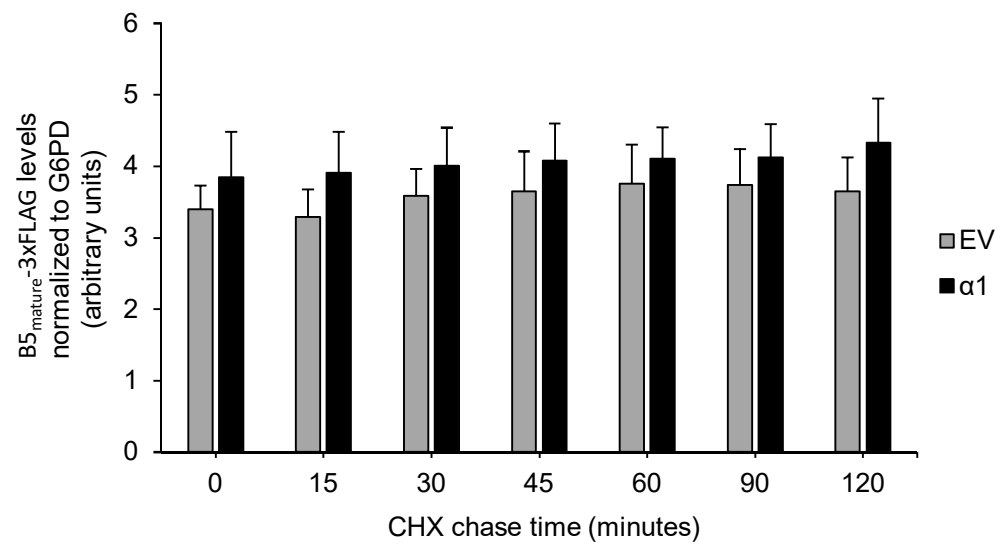

Howell *et al*, Supplementary Figure S6  
Data related to Figure 7 in main text

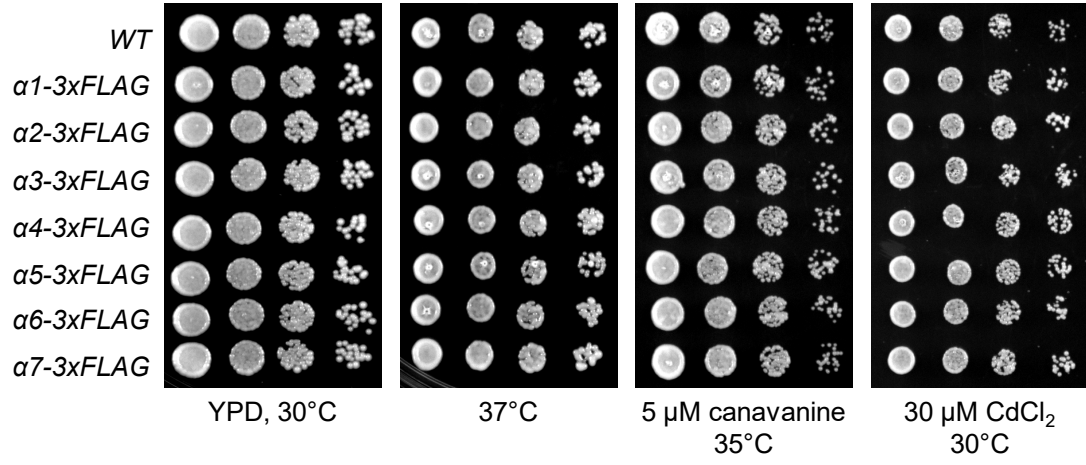

Howell *et al*, Supplementary Figure S7  
Data related to Discussion in main text

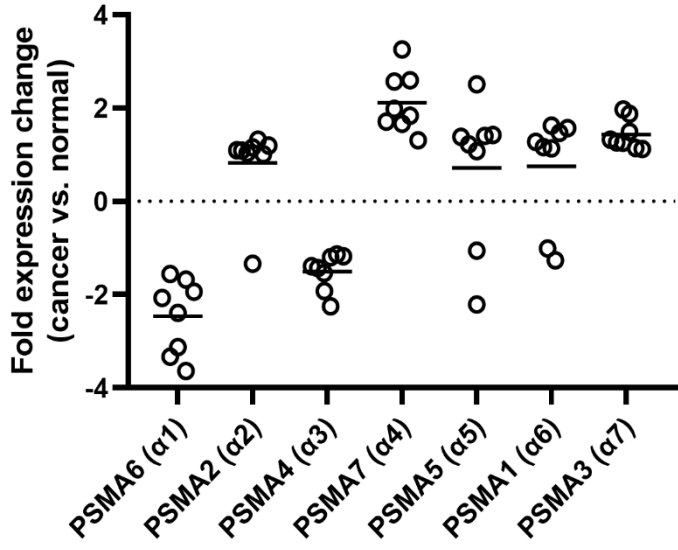



**Fig. 1d - 20S**

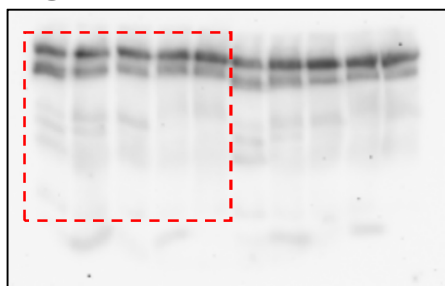

**Fig. 1d - Rpn12**

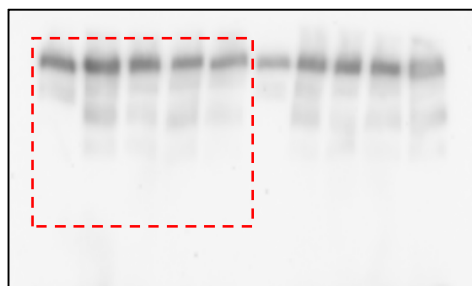

**Fig. 3a**

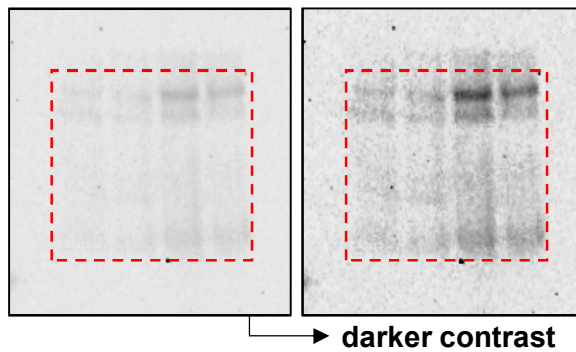

**Fig. 3b**

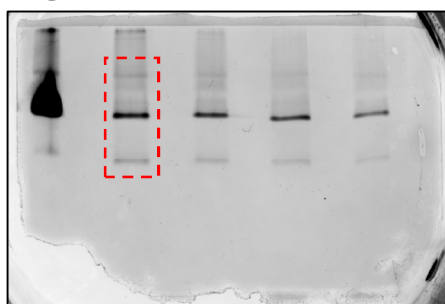

**Fig. 4a**

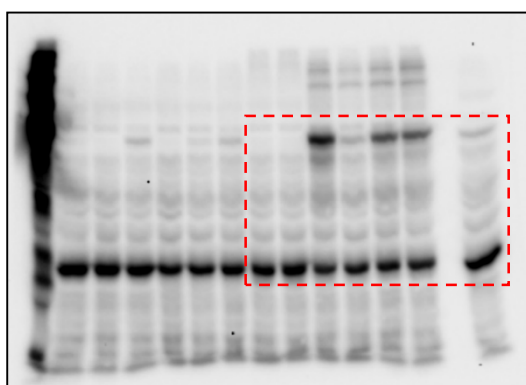

**Fig. 4c**

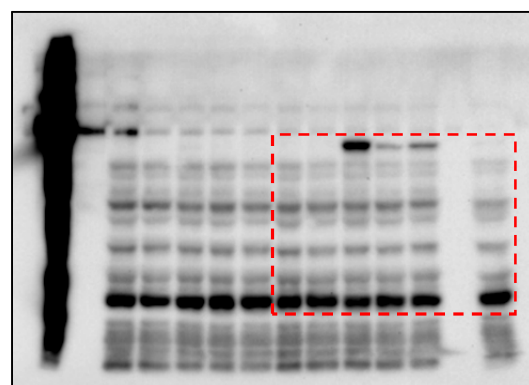

**Fig. 5d**

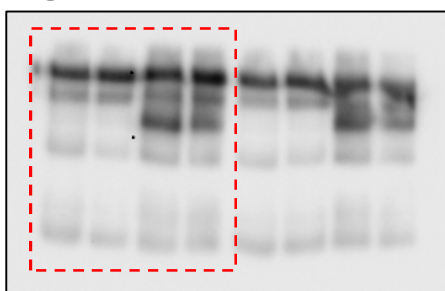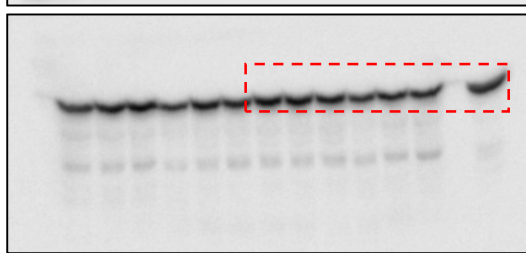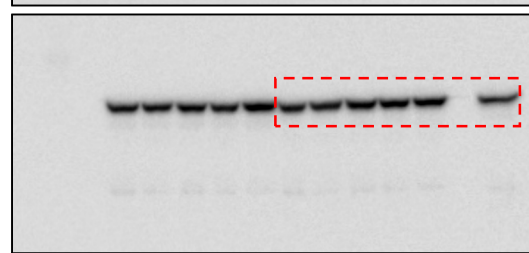

**Fig. 6**

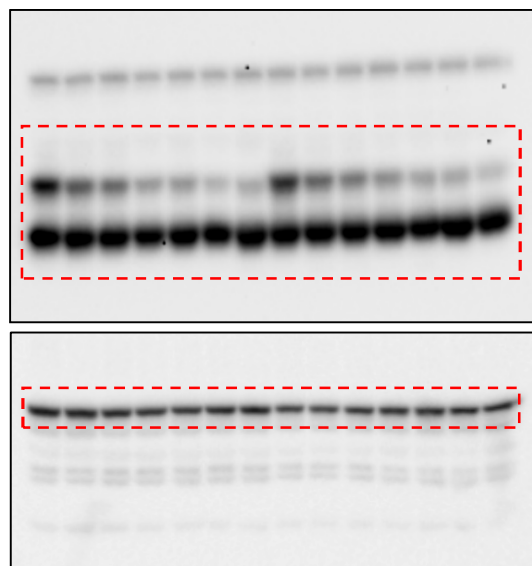

**Fig. 7a**

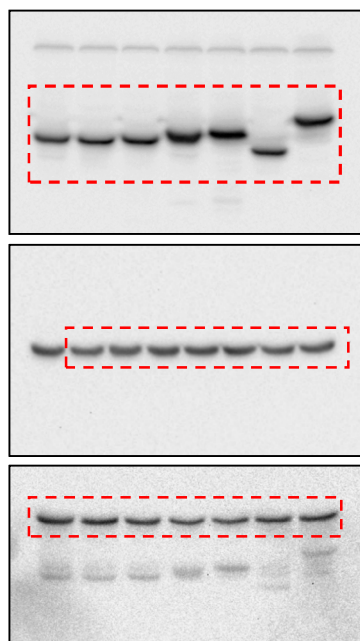

**Fig. 7b**

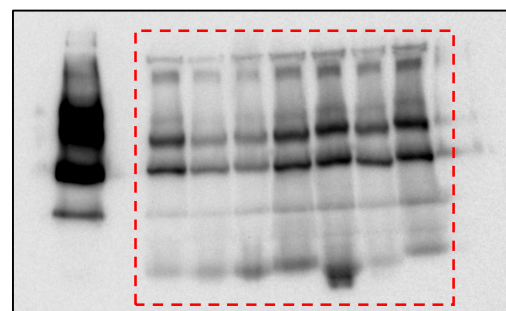

**Fig. 7c**

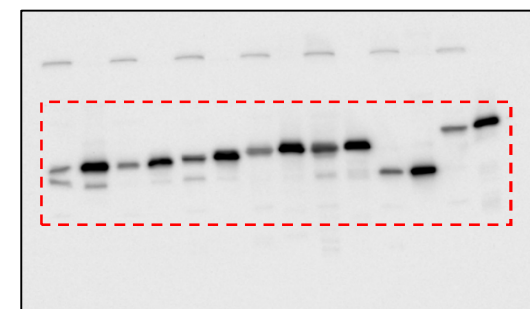

**Supplementary Fig. S1c**

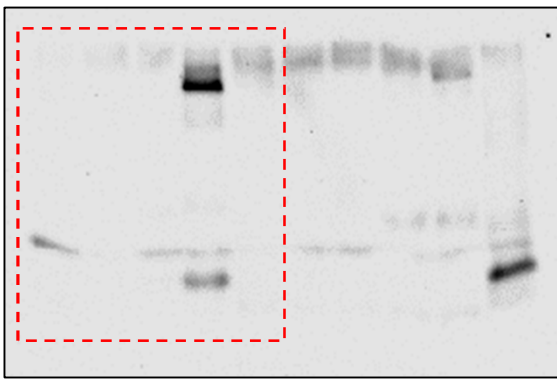

**Supplementary Fig. S2b**

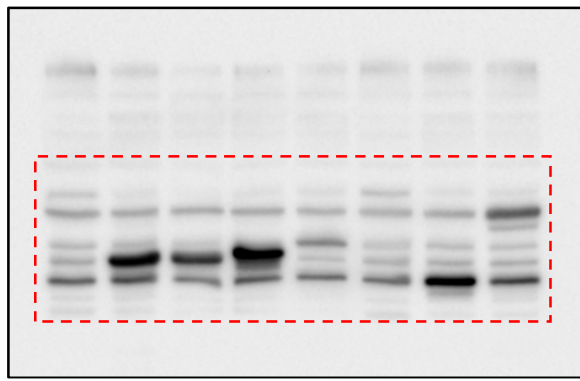

**Supplementary Fig. S2c**

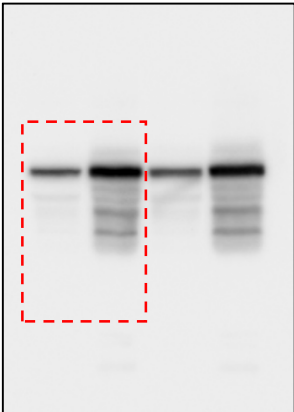

**Supplementary Fig. S2d**

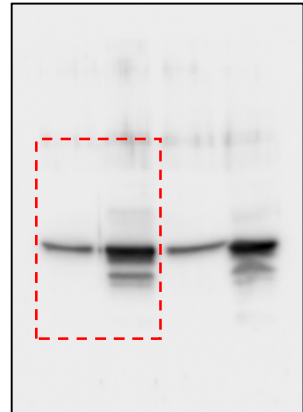

**Supplementary Fig. S4**

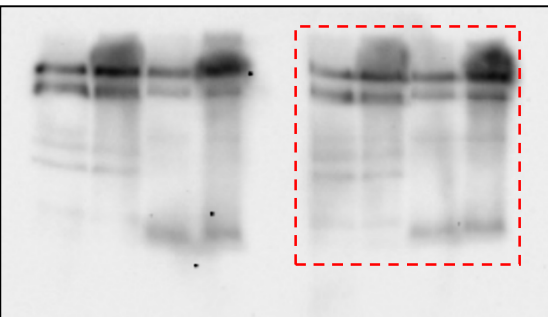

## Supplementary Figure Legends

**Supplementary Figure S1 related to Figure 1 in main text.** (a) Estimation of intra-ring distance constraints for design of split-DHFR reporter system. A top view of the  $\alpha$ -ring (PDB 1RYP) is shown, with the C-terminal amino acids of each subunit displayed as blue spheres. Example measurements of the distance between the C-terminal carboxylate carbons of nearest-adjacent neighbor and nearest-nonadjacent neighbor subunits are shown. Nearest-adjacent measurements spanned  $\sim 42$ - $62$  Å, whereas all nearest-nonadjacent measurements were greater than 86 Å. (b) Estimation of inter-ring distance constraints for design of split-DHFR reporter system. A side view of the  $\alpha$ -ring (PDB 1RYP) is shown, with the C-terminal amino acids of opposing  $\alpha$ -subunits displayed as blue spheres. An example measurement of the distance between the nearest inter-ring  $\alpha$ -subunits is shown. All such measurements exceeded 129 Å. (c) Cell extracts from yeast strains expressing  $\alpha$ -subunit fusions to N- or C-terminal DHFR fragments (designated [DH] or [FR], respectively) from their chromosomal loci were separated by non-denaturing PAGE and immunoblotted with antibodies against the C-terminal DHFR fragment. The positions of doubly-capped CP (RP<sub>2</sub>CP) and singly-capped CP (RP<sub>1</sub>CP) are shown. Under non-denaturing conditions, the [FR] fragment appears to be cleaved from subunits, but is stabilized upon complementation by an adjacent  $\alpha$ -subunit [DH] fusion. \*\*, possible CP assembly intermediate; ^, cross-reactive species. Full-length blot is presented in Supplementary Fig. S9. (d,e) Equal numbers of cells from the indicated yeast strains were spotted in six-fold serial dilutions on synthetic complete plates lacking or containing MTX and incubated for three days at 30°C. The illustration of the 26S proteasome accompanying (e) depicts the location of the RP base subunit Rpn1 relative to the  $\alpha$ -subunits  $\alpha 2$  and  $\alpha 5$ .

**Supplementary Figure S2 related to Figure 2 in main text.** (a) Overexpression of *PDR1* does not confer MTX resistance. The gene encoding *PDR1*, a transcription factor that regulates the pleiotropic drug response, was also encoded by the genomic fragment containing  *$\alpha 1$* . To test whether the enhanced growth on MTX could be due to Pdr1-dependent efflux of MTX from cells, the  $\alpha 2$ - $\alpha 3$  [DHFR] *pba3* $\Delta$  reporter strain was transformed with a high-copy plasmid encoding *PDR1*. Transformants were spotted in six-fold serial dilutions onto synthetic complete plates lacking or containing MTX and incubated for three days at 30°C. Overexpression of Pdr1 did not confer growth on MTX. The growth assay shown here is an uncropped form of the image shown in **Fig. 2b in main text**. EV, empty vector. (b-d) Whole cell extracts were prepared from *pba3* $\Delta$  cells transformed with high-copy plasmids encoding the indicated proteins (**from Fig. 2c in main text**), followed by SDS-PAGE and immunoblotting with antibodies against the 20S CP (b), the RP base subunit Rpt5 (c), or the RP lid subunit Rpn12 (d). The 20S antibody does not recognize the  $\alpha 5$  subunit. EV, empty vector. Full-length blots are presented in Supplementary Fig. S9. (e) Equal numbers of cells from the indicated yeast strains expressing empty vector (EV),  $\alpha 1$ , or  $\alpha 7$  from a high-copy plasmid were spotted in six-fold serial dilutions on the indicated media and incubated as specified for three days.

**Supplementary Figure S3 related to Figure 3 in main text.** Equal numbers of cells from the indicated yeast strains were spotted in six-fold serial dilutions on YPD plates and incubated for two days at 30°C.

**Supplementary Figure S4 related to Figure 5 in main text.** Cell extracts of WT or *pba3* $\Delta$  yeast expressing empty vector (EV) or  $\alpha 1$  from a high-copy plasmid were separated by non-denaturing PAGE and immunoblotted with antibodies against the 20S CP. The positions of doubly-capped CP (RP<sub>2</sub>CP), singly-capped CP (RP<sub>1</sub>CP), and CP are shown. \*\*, CP assembly intermediates; ^, Blm10-CP; \*, cross-reactive species that forms upon exogenous expression of  $\alpha 1$ . Full-length blot is presented in Supplementary Fig. S9.

**Supplementary Figure S5 related to Figure 6 in main text.** Quantification of mature  $\beta 5$  levels throughout the course of the cycloheximide (CHX) chase shown in **Fig. 6 in main text**. Bands corresponding to the mature species ( $\beta 5_{\text{mature}}\text{-3xFLAG}$ ) were normalized to the G6PD loading control ( $n = 8$ ; error bars = s.e.m.).

**Supplementary Figure S6 related to Figure 7 in main text.** Equal numbers of cells from the indicated yeast strains were spotted in six-fold serial dilutions on the indicated media and incubated for two days as specified.

**Supplementary Figure S7 related to Discussion in main text.** Differential mRNA expression of proteasome  $\alpha$ -subunits was examined in eight published testicular cancer datasets exhibiting elevated  $\alpha 4$  mRNA levels (Korkola et al., 2006 (mixed germ cell tumor, embryonal carcinoma, seminoma, yolk sac tumor, and teratoma); Skotheim et al., 2005 (embryonal carcinoma, yolk sac tumor, and teratoma)) using OncoPrint ([www.oncoPrint.org](http://www.oncoPrint.org)). Data points represent the fold change in expression of a given gene for each cancer subtype, calculated via “cancer vs. normal” analysis (Rhodes et al., 2007). The means for each  $\alpha$ -subunit is shown as a horizontal bar

**Supplementary Figure S8: Full-length blots/gels for main text figures.** Red boxes indicate the cropped portion of the blot/gel used in the figure.

**Supplementary Figure S9: Full-length blots for Supplementary Figures.** Red boxes indicate the cropped portion of the blot used in the figure.

**Supplementary Table S1: Yeast strains used in this study**

| <b>Name</b> | <b>Genotype</b>                                                                                    | <b>Source</b>             |
|-------------|----------------------------------------------------------------------------------------------------|---------------------------|
| RTY1        | <i>MATa his3-Δ200 leu2-3,112 ura3-52 lys2-801 trp1-1</i> (alias MHY500)                            | Chen et al., 1993         |
| RTY2        | <i>MATα his3-Δ200 leu2-3,112 ura3-52 lys2-801 trp1-1</i> (alias MHY501)                            | Chen et al., 1993         |
| RTY7        | <i>MATa ura3-52 leu2-Δ1 his3-Δ200 trp1-Δ63 lys2-801 ade2-101</i> (alias YPH499)                    | Sikorski and Hieter, 1989 |
| RTY25       | <i>MATa ura3-52 leu2-Δ1 his3-Δ200 trp1-Δ63 lys2-801 ade2-101 ump1Δ::HIS3</i>                       | This study                |
| RTY361      | <i>MATα ura3-52 leu2-Δ1 his3-Δ200 trp1-Δ63 lys2-801 ade2-101 RPN1-GFP(S65T)::kanMX6</i>            | This study                |
| RTY978      | <i>MATα his3-Δ200 leu2-3,112 ura3-52 lys2-801 trp1-1 PRE6-yEGFP::kanMX6</i>                        | Nemec et al., 2017        |
| RTY1008     | <i>MATa his3-Δ200 leu2-3,112 ura3-52 lys2-801 trp1-1 pba3Δ::kanMX4</i> (alias MHY4386)             | Kusmierczyk et al., 2008  |
| RTY1010     | <i>MATa his3-Δ200 leu2-3,112 ura3-52 lys2-801 trp1-1 pba4Δ::hphMX4</i> (alias MHY4298)             | Kusmierczyk et al., 2008  |
| RTY1064     | <i>MATa his3-Δ200 leu2-3,112 ura3-52 lys2-801 trp1-1 pre9Δ::natMX4</i>                             | This study                |
| RTY1244     | <i>MATa his3-Δ200 leu2-3,112 ura3-52 lys2-801 trp1-1 PRE8-DHFR[1,2]:natMX4</i>                     | This study                |
| RTY1249     | <i>MATa his3-Δ200 leu2-3,112 ura3-52 lys2-801 trp1-1 PRE9-DHFR[1,2]:natMX4</i>                     | This study                |
| RTY1255     | <i>MATa his3-Δ200 leu2-3,112 ura3-52 lys2-801 trp1-1 PRE9-DHFR[3]:hphMX4</i>                       | This study                |
| RTY1257     | <i>MATa his3-Δ200 leu2-3,112 ura3-52 lys2-801 trp1-1 PRE8-DHFR[3]:hphMX4</i>                       | This study                |
| RTY1263     | <i>MATa his3-Δ200 leu2-3,112 ura3-52 lys2-801 trp1-1 PRE8-DHFR[1,2]:natMX4 PRE9-DHFR[3]:hphMX4</i> | This study                |

|         |                                                                                                                                                                                                        |                          |
|---------|--------------------------------------------------------------------------------------------------------------------------------------------------------------------------------------------------------|--------------------------|
| RTY1274 | <i>MAT<math>\alpha</math> his3-<math>\Delta</math>200 leu2-3,112 ura3-52 lys2-801 trp1-1 PRE9-DHFR[1,2]:natMX4 PRE8-DHFR[3]:hphMX4</i>                                                                 | This study               |
| RTY1304 | <i>MAT<math>\alpha</math> his3-<math>\Delta</math>200 leu2-3,112 ura3-52 lys2-801 trp1-1 PRE8-DHFR[1,2]:natMX4 PRE9-DHFR[3]:hphMX4 pba3<math>\Delta</math>::kanMX4</i>                                 | This study               |
| RTY1310 | <i>MAT<math>\alpha</math> his3-<math>\Delta</math>200 leu2-3,112 ura3-52 lys2-801 trp1-1 PRE8-DHFR[1,2]:natMX4 PRE9-DHFR[3]:hphMX4 nas2<math>\Delta</math>::HIS3</i>                                   | This study               |
| RTY1337 | <i>MAT<math>\alpha</math> his3-<math>\Delta</math>200 leu2-3,112 ura3-52 lys2-801 trp1-1 pre6<math>\Delta</math>::HIS3 [pRS317-pre6-N79C-6His] pre9<math>\Delta</math>::HIS3 (alias MHY2896)</i>       | Velichutina et al., 2004 |
| RTY1338 | <i>MAT<math>\alpha</math> his3-<math>\Delta</math>200 leu2-3,112 ura3-52 lys2-801 trp1-1 pre6<math>\Delta</math>::HIS3 [pRS317-pre6-I155C-6His] pre9<math>\Delta</math>::HIS3 (alias MHY2897)</i>      | Velichutina et al., 2004 |
| RTY1339 | <i>MAT<math>\alpha</math> his3-<math>\Delta</math>200 leu2-3,112 ura3-52 lys2-801 trp1-1 pre6<math>\Delta</math>::HIS3 [pRS317-pre6-N79C,I155C-6His] (alias MHY2900)</i>                               | Velichutina et al., 2004 |
| RTY1340 | <i>MAT<math>\alpha</math> his3-<math>\Delta</math>200 leu2-3,112 ura3-52 lys2-801 trp1-1 pre6<math>\Delta</math>::HIS3 [pRS317-pre6-N79C,I155C-6His] pre9<math>\Delta</math>::HIS3 (alias MHY2901)</i> | Velichutina et al., 2004 |
| RTY1347 | <i>MAT<math>\alpha</math> his3-<math>\Delta</math>200 leu2-3,112 ura3-52 lys2-801 trp1-1 PRE8-DHFR[1,2]:natMX4 PRE9-DHFR[3]:hphMX4 pba1<math>\Delta</math>::kanMX4</i>                                 | This study               |
| RTY1434 | <i>MAT<math>\alpha</math> his3-<math>\Delta</math>200 leu2-3,112 ura3-52 lys2-801 trp1-1 pre6<math>\Delta</math>::HIS3 [pRS316-PRE6] pre9<math>\Delta</math>::HIS3</i>                                 | This study               |
| RTY1446 | <i>MAT<math>\alpha</math> his3-<math>\Delta</math>200 leu2-3,112 ura3-52 lys2-801 trp1-1 PUP2-DHFR[1,2]:natMX4</i>                                                                                     | This study               |
| RTY1454 | <i>MAT<math>\alpha</math> his3-<math>\Delta</math>200 leu2-3,112 ura3-52 lys2-801 trp1-1 PUP2-DHFR[3]:hphMX4</i>                                                                                       | This study               |
| RTY1479 | <i>MAT<math>\alpha</math> his3-<math>\Delta</math>200 leu2-3,112 ura3-52 lys2-801 trp1-1 PUP2-DHFR[1,2]:natMX4 PRE9-DHFR[3]:hphMX4</i>                                                                 | This study               |
| RTY1637 | <i>MAT<math>\alpha</math> his3-<math>\Delta</math>200 leu2-3,112 ura3-52 lys2-801 trp1-1 pre6<math>\Delta</math>::HIS3 [pRS316-PRE6]</i>                                                               | This study               |
| RTY1680 | <i>MAT<math>\alpha</math> his3-<math>\Delta</math>200 leu2-3,112 ura3-52 lys2-801 trp1-1 PRE9-DHFR[1,2]:natMX4 pre6<math>\Delta</math>::HIS3 [pRS316-PRE6]</i>                                         | This study               |
| RTY1686 | <i>MAT<math>\alpha</math> his3-<math>\Delta</math>200 leu2-3,112 ura3-52 lys2-801 trp1-1 PUP2-DHFR[3]:hphMX4 pre6<math>\Delta</math>::HIS3 [pRS316-PRE6]</i>                                           | This study               |
| RTY1693 | <i>MAT<math>\alpha</math> his3-<math>\Delta</math>200 leu2-3,112 ura3-52 lys2-801 trp1-1 SCL1-DHFR[1,2]:natMX4 PRE8-DHFR[3]:hphMX4</i>                                                                 | This study               |

|         |                                                                                                                                |                          |
|---------|--------------------------------------------------------------------------------------------------------------------------------|--------------------------|
| RTY1734 | <i>MATa his3-Δ200 leu2-3,112 ura3-52 lys2-801 trp1-1 RPN1-DHFR[1,2]:natMX4</i>                                                 | This study               |
| RTY1768 | <i>MATa his3-Δ200 leu2-3,112 ura3-52 lys2-801 trp1-1 RPN1-DHFR[1,2]:natMX4 PUP2-DHFR[3]:hphMX4</i>                             | This study               |
| RTY1884 | <i>MATa his3-Δ200 leu2-3,112 ura3-52 lys2-801 trp1-1 PRE8-DHFR[1,2]:natMX4 RPN1-DHFR[3]:hphMX4</i>                             | This study               |
| RTY2002 | <i>MATα his3-Δ200 leu2-3,112 ura3-52 lys2-801 trp1-1 SCL1-DHFR[1,2]:natMX4 pre6Δ::HIS3 [pRS316-PRE6]</i>                       | This study               |
| RTY2004 | <i>MATα his3-Δ200 leu2-3,112 ura3-52 lys2-801 trp1-1 PRE8-DHFR[1,2]:natMX4 PUP2-DHFR[3]:hphMX4</i>                             | This study               |
| RTY2116 | <i>MATα his3-Δ200 leu2-3,112 ura3-52 lys2-801 trp1-1 PRE8-DHFR[1,2]:natMX4 PRE9-DHFR[3]:hphMX4 PRE6-yEGFP:kanMX6</i>           | This study               |
| RTY2117 | <i>MATa his3-Δ200 leu2-3,112 ura3-52 lys2-801 trp1-1 PRE8-DHFR[1,2]:natMX4 PRE9-DHFR[3]:hphMX4 RPN1-GFP(S65T):kanMX6</i>       | This study               |
| RTY2205 | <i>MATα his3-Δ200 leu2-3,112 ura3-52 lys2-801 trp1-1 pba3Δ::kanMX4 pre6Δ::HIS3 [pRS316-PRE6]</i>                               | This study               |
| RTY2206 | <i>MATa his3-Δ200 leu2-3,112 ura3-52 lys2-801 trp1-1 pre6Δ::HIS3 [pRS317-pre6-N79C,I155C-6His] pba3Δ::kanMX4</i>               | This study               |
| RTY2213 | <i>MATa his3-Δ200 leu2-3,112 ura3-52 lys2-801 trp1-1 pre8-K160C-HF::URA3 pre9Δ::HIS3 [pRS315-pre9-L56C-T7] pba3Δ::kanMX4</i>   | This study               |
| RTY2214 | <i>MATα his3-Δ200 leu2-3,112 ura3-52 lys2-801 trp1-1 pre8-K160C-HF::URA3 pre9Δ::HIS3 [pRS315-PRE9-T7] (alias MHY1838)</i>      | Velichutina et al., 2004 |
| RTY2215 | <i>MATα his3-Δ200 leu2-3,112 ura3-52 lys2-801 trp1-1 PRE8-HF:URA3 pre9Δ::HIS3 [pRS315-pre9-L56C-T7] (alias MHY1850)</i>        | Velichutina et al., 2004 |
| RTY2216 | <i>MATα his3-Δ200 leu2-3,112 ura3-52 lys2-801 trp1-1 pre8-K160C-HF::URA3 pre9Δ::HIS3 [pRS315-pre9-L56C-T7] (alias MHY1839)</i> | Velichutina et al., 2004 |
| RTY2231 | <i>MATa his3-Δ200 leu2-3,112 ura3-52 lys2-801 trp1-1 PRE2-6xGly-3xFLAG:HIS3MX6</i>                                             | This study               |
| RTY2263 | <i>MATa his3-Δ200 leu2-3,112 ura3-52 lys2-801 trp1-1 PRE1-6xGly-3xFLAG:kanMX6 pba3Δ::kanMX4</i>                                | This study               |
| RTY2320 | <i>MATa his3-Δ200 leu2-3,112 ura3-52 lys2-801 trp1-1 SCL1-6xGly-3xFLAG:HIS3MX6</i>                                             | This study               |

|         |                                                                                                  |            |
|---------|--------------------------------------------------------------------------------------------------|------------|
| RTY2322 | <i>MATa his3-Δ200 leu2-3,112 ura3-52 lys2-801 trp1-1 PRE8-6xGly-3xFLAG:HIS3MX6</i>               | This study |
| RTY2324 | <i>MATa his3-Δ200 leu2-3,112 ura3-52 lys2-801 trp1-1 PRE9-6xGly-3xFLAG:HIS3MX6</i>               | This study |
| RTY2326 | <i>MATa his3-Δ200 leu2-3,112 ura3-52 lys2-801 trp1-1 PRE6-6xGly-3xFLAG:HIS3MX6</i>               | This study |
| RTY2328 | <i>MATa his3-Δ200 leu2-3,112 ura3-52 lys2-801 trp1-1 PUP2-6xGly-3xFLAG:HIS3MX6</i>               | This study |
| RTY2330 | <i>MATa his3-Δ200 leu2-3,112 ura3-52 lys2-801 trp1-1 PRE5-6xGly-3xFLAG:HIS3MX6</i>               | This study |
| RTY2332 | <i>MATa his3-Δ200 leu2-3,112 ura3-52 lys2-801 trp1-1 PRE10-6xGly-3xFLAG:HIS3MX6</i>              | This study |
| RTY2510 | <i>MATa his3-Δ200 leu2-3,112 ura3-52 lys2-801 trp1-1 PRE6-6xGly-3xFLAG:HIS3MX6 pba3Δ::kanMX4</i> | This study |



**Supplementary Table S2: Plasmids used in this study**

| <b>Name</b> | <b>Genotype</b>          | <b>Source</b>             |
|-------------|--------------------------|---------------------------|
| pRT474      | pRS424                   | Christianson et al., 1992 |
| pRT711      | pRS424-PRE8              | This study                |
| pRT845      | pRS424-RPN12             | This study                |
| pRT1449*    | pAG25-DHFR[1,2] (natMX4) | Tarassov et al., 2008     |
| pRT1450*    | pAG32-DHFR[3] (hphMX4)   | Tarassov et al., 2008     |
| pRT1513     | pRS314-PRE6              | This study                |
| pRT1514     | pRS315-PRE6              | This study                |
| pRT1515     | pRS424-PRE9              | This study                |
| pRT1516     | pRS424-PRE6              | This study                |
| pRT1517     | pRS424-PRE10             | This study                |
| pRT1526     | pRS314-PRE6-DHFR[1,2]    | This study                |
| pRT1527     | pRS315-PRE6-DHFR[3]      | This study                |
| pRT1885     | pRS424-RPT5              | This study                |
| pRT1964     | pRS424-PBA3              | This study                |

|         |             |            |
|---------|-------------|------------|
| pRT1976 | pRS424-SCL1 | This study |
| pRT2202 | pRS424-PDR1 | This study |
| pRT2203 | pRS424-DOA5 | This study |
| pRT2204 | pRS424-PRE5 | This study |

---

\* The linker sequence for pRT1449 and pRT1450 is as follows: GGCGGTGGCGGATCAGGAG  
GCGGTGGGTCT, encoding amino acids GGGSGGGGS.

## Supplementary References

- Chen, P., Johnson, P., Sommer, T., Jentsch, S. & Hochstrasser, M. Multiple ubiquitin-conjugating enzymes participate in the *in vivo* degradation of the yeast MAT alpha 2 repressor. *Cell* **74**, 357-369 (1993).
- Christianson, T. W., Sikorski, R. S., Dante, M., Shero, J. H. & Hieter, P. Multifunctional yeast high-copy-number shuttle vectors. *Gene* **110**, 119-122 (1992).
- Funakoshi, M., Tomko, R. J., Jr., Kobayashi, H. & Hochstrasser, M. Multiple assembly chaperones govern biogenesis of the proteasome regulatory particle base. *Cell* **137**, 887-899 (2009).
- Korkola, J. E. et al. Down-regulation of stem cell genes, including those in a 200-kb gene cluster at 12p13.31, is associated with *in vivo* differentiation of human male germ cell tumors. *Cancer Research* **66**, 820-827 (2006).
- Kusmierczyk, A. R., Kunjappu, M. J., Funakoshi, M. & Hochstrasser, M. A multimeric assembly factor controls the formation of alternative 20S proteasomes. *Nature Structural & Molecular Biology* **15**, 237 (2008).
- Nemec, A. A., Howell, L. A., Peterson, A. K., Murray, M. A. & Tomko, R. J., Jr. Autophagic clearance of proteasomes in yeast requires the conserved sorting nexin Snx4. *The Journal of Biological Chemistry* **292**, 21466-21480 (2017).
- Rhodes, D. R. et al. Oncomine 3.0: genes, pathways, and networks in a collection of 18,000 cancer gene expression profiles. *Neoplasia* **9**, 166-180 (2007).
- Sikorski, R. S. & Hieter, P. A system of shuttle vectors and yeast host strains designed for efficient manipulation of DNA in *Saccharomyces cerevisiae*. *Genetics* **122**, 19-27 (1989).
- Skotheim, R. I. et al. Differentiation of human embryonal carcinomas *in vitro* and *in vivo* reveals expression profiles relevant to normal development. *Cancer Research* **65**, 5588-5598 (2005).
- Tarassov, K. et al. An *in vivo* map of the yeast protein interactome. *Science* **320**, 1465-1470 (2008).
- Velichutina, I., Connerly, P. L., Arendt, C. S., Li, X. & Hochstrasser, M. Plasticity in eucaryotic 20S proteasome ring assembly revealed by a subunit deletion in yeast. *The EMBO Journal* **23**, 500-510 (2004).
